# Supplementary material for: Effective Preventive Strategies to Prevent Secondary Transmission of COVID-19 in Hemodialysis Unit: The First Month of Community Outbreak in Taiwan
Source: MDPI journal article supplement (doi:10.3390/healthcare9091173), 2021-09-07
Supplement: s1 [file s1]

**Table S1.** Clinical characteristics of non-COVID and COVID patients on maintenance hemodialysis in Kee-lung Chang Gung Memorial Hospital ( $n = 497$ ).

|                            | All HD patients ( $n = 497$ ) | Non-COVID patients ( $n = 496$ ) | COVID patient ( $n = 1$ ) |
|----------------------------|-------------------------------|----------------------------------|---------------------------|
| Male, $n$ , (%)            | 263 (53)                      | 263 (53)                         | 0 (0)                     |
| Age, year                  | $66.03 \pm 13.28$             | $66.04 \pm 13.29$                | 60.88                     |
| W.B.C. (x1000/uL)          | $6.62 \pm 2.87$               | $6.61 \pm 2.87$                  | 6.80                      |
| Hb (g/dL)                  | $10.06 \pm 1.25$              | $10.07 \pm 1.25$                 | 8.20                      |
| Platelet (x1000/uL)        | $190.47 \pm 68.53$            | $190.51 \pm 68.60$               | 173                       |
| Albumin (g/dL)             | $4.00 \pm 0.48$               | $4.00 \pm 0.49$                  | 3.76                      |
| AST (IU/L)                 | $18.49 \pm 10.31$             | $18.49 \pm 10.32$                | 16                        |
| ALT (IU/L)                 | $17.87 \pm 14.74$             | $17.87 \pm 14.75$                | 17                        |
| Alkaline-P (IU/L)          | 92 (71-137)*                  | 92 (71-137)*                     | 128                       |
| Total Bilirubin (mg/dL)    | $0.38 \pm 0.16$               | $0.38 \pm 0.16$                  | 0.3                       |
| Cholesterol (mg/dL)        | $153.76 \pm 36.27$            | $153.79 \pm 36.31$               | 139                       |
| Triglyceride(mg/dL)        | $151.77 \pm 116.22$           | $151.92 \pm 116.30$              | 82                        |
| Creatinine (mg/dL)         | $9.40 \pm 2.68$               | $9.40 \pm 2.68$                  | 9.04                      |
| Uric acid (mg/dL)          | $6.43 \pm 1.82$               | $6.43 \pm 1.82$                  | 6.9                       |
| Na (meq/L)                 | $138.10 \pm 3.21$             | $138.10 \pm 3.21$                | 137                       |
| K (meq/L)                  | $4.70 \pm 0.83$               | $4.70 \pm 0.83$                  | 5.7                       |
| Ca (mg/dL)                 | $9.33 \pm 0.90$               | $9.33 \pm 0.89$                  | 8.80                      |
| P (mg/dL)                  | $5.26 \pm 1.55$               | $5.26 \pm 1.55$                  | 6.00                      |
| Kt/V (Daugirdes)           | $1.67 \pm 0.33$               | $1.67 \pm 0.33$                  | 1.46                      |
| nPCR (g/kg/day)            | $1.08 \pm 0.39$               | $1.08 \pm 0.39$                  | 1.03                      |
| Ferritin (ng/mL)           | $496.46 \pm 415.14$           | $497.43 \pm 415.05$              | 41.9                      |
| Transferrin saturation (%) | $33.00 \pm 14.51$             | $33.03 \pm 14.51$                | 17.11                     |
| intact-PTH (pg/mL)         | 285 (119, 672)*               | 284.50(118.75, 672.75)*          | 440                       |
| Cardiac/thoracic ratio     | $0.52 \pm 0.07$               | $0.52 \pm 0.06$                  | 0.48                      |
| Ca x P product             | $49.17 \pm 15.67$             | $49.17 \pm 15.68$                | 52.80                     |

Abbreviation: WBC, white blood cell count; AST, aspartate transaminase; ALT, alanine aminotransferase; Hb, hemoglobin; i-PTH, intact-parathyroid hormone; nPCR, normalized protein catabolic rate. \*Data are expressed as median (interquartile range)

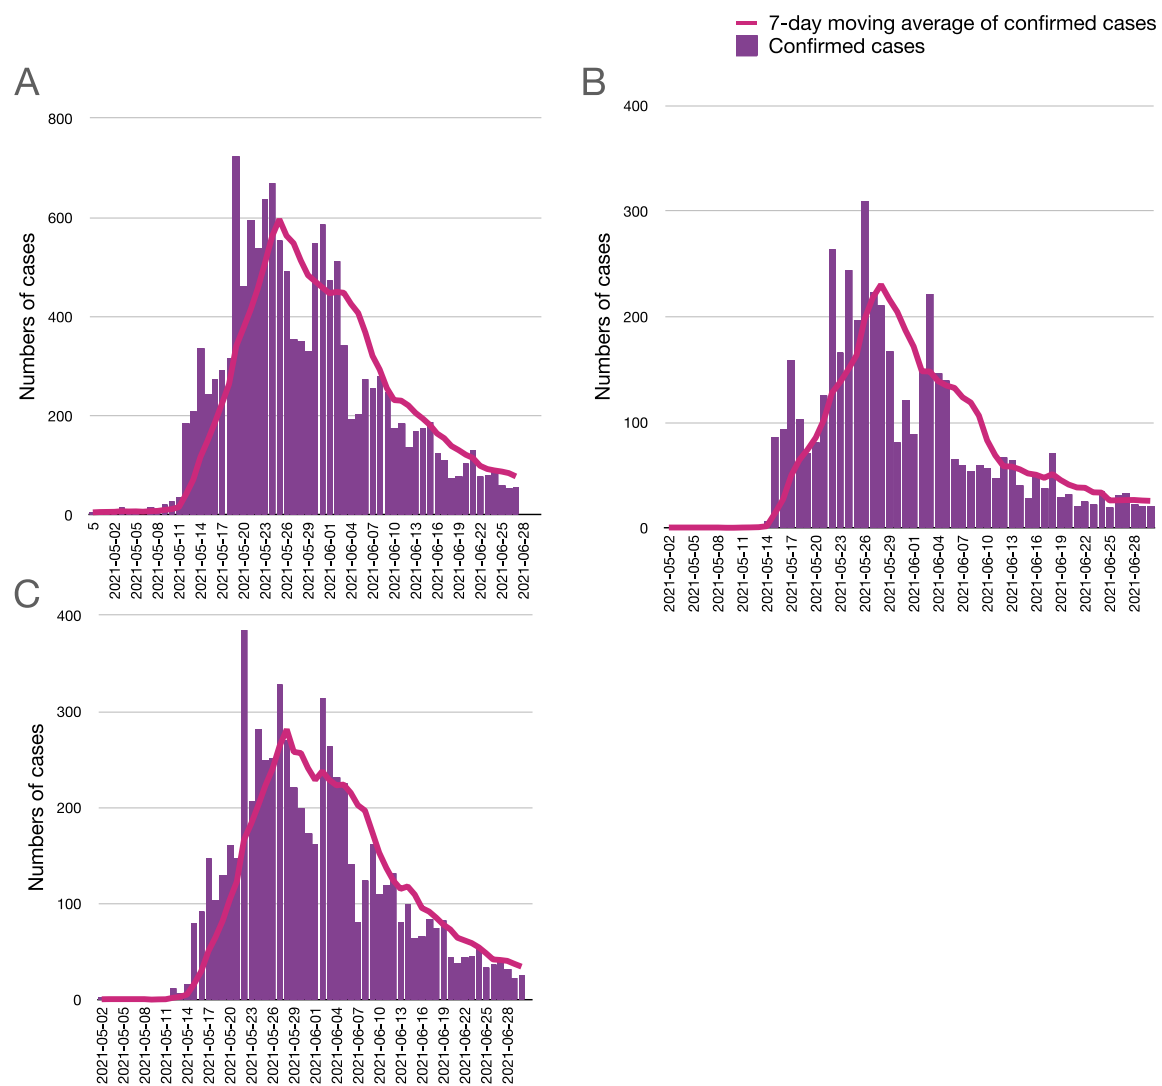

Figure S1: Estimates of COVID-19 confirmed case number and 7-days moving average of confirmed cases. (A) National estimates, (B) in Taipei City and (C) in New Taipei City.

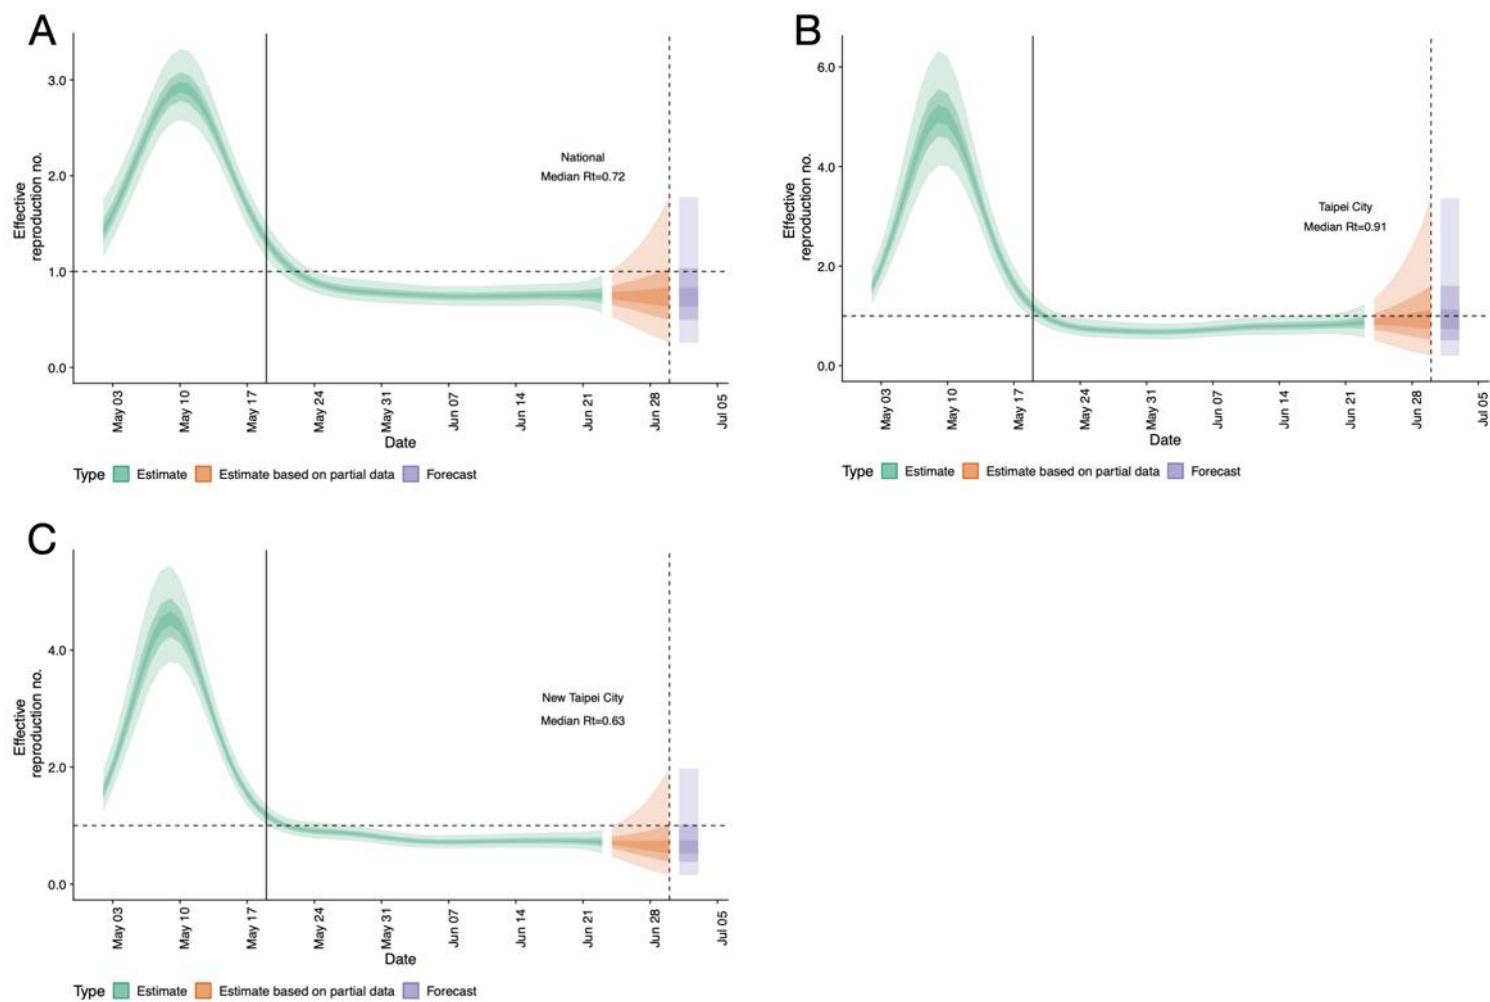

Figure S2: Estimated and predicted time-varying reproduction number ( $R_t$ ) of SARS-CoV-2 using national and subnational case counts reported in Taiwan Centers for Disease Control between May 2, 2021 and June 30, 2021. Estimation of time-varying  $R_t$  with 20%, 50%, 90% credible intervals using national data in Taiwan (A), Taipei City (B) and New Taipei City (C).
